# Supplementary material for: Magnetic cross-linked enzyme aggregate based on ionic liquid modification as a novel immobilized biocatalyst for phytosterol esterification
Source: Royal Society of Chemistry journal article supplement (doi:10.1039/d2cy00882c), 2022-01-01
Supplement: d2cy00882c1.pdf [file d2cy00882c1.pdf]

## Supporting information

### Magnetic cross-linked enzyme aggregates based on ionic liquid modification as novel immobilized biocatalyst for phytosterol esterification

Zou Bin <sup>a,b\*</sup>, Feng Ting <sup>a</sup>, Yan Yan <sup>a</sup>, Liu Feng <sup>a</sup>, Onyinye, Adesanya Idowu <sup>a</sup>, Suo Hongbo <sup>c</sup>.

<sup>a</sup> School of Food and Biological Engineering,  
Jiangsu University, Zhenjiang 212013, China.

<sup>b</sup> State Key Laboratory of Food Science and Technology,  
Jiangnan University, Wuxi, 214122, China.

<sup>c</sup> School of Pharmaceutical Sciences,  
Liaocheng University, Liaocheng, 252059, China.

#### Content

1. Thermogravimetric analysis (TGA) of Fe<sub>3</sub>O<sub>4</sub>-NH<sub>2</sub> and CRL-FIL-CLEAs@Fe<sub>3</sub>O<sub>4</sub> (**Fig. 1s**).
2. Reuse of different catalysts in the esterification reaction (**Fig. 2s**).
3. Confocal laser scanning microscopy (CLSM) images of : (a) Free lipase; (b) CRL-FIL-CLEAs@Fe<sub>3</sub>O<sub>4</sub>; (c) CRL-FIL-CLEAs@Fe<sub>3</sub>O<sub>4</sub> (5X); (d) CRL-FIL-CLEAs @Fe<sub>3</sub>O<sub>4</sub> (repeated 5 times); (e) CRL-FIL-CLEAs@Fe<sub>3</sub>O<sub>4</sub> (repeated 5 times, 5X) (**Fig.3s**).
4. Conversion data of phytosterols with CRL-FIL-CLEAs@Fe<sub>3</sub>O<sub>4</sub> at different times (**Table 1s**).
5. Comparison of enzyme-catalyzed esterification of phytosterols and fatty acids (FA) with other reported references (**Table 2s**).
6. Secondary structures for free lipase and CRL-FIL-CLEAs@Fe<sub>3</sub>O<sub>4</sub> (**Table 3s**).

---

\*To whom correspondence should be addressed. The postal address: Jiangsu University, No.301 Xuefu Road, Zhenjiang 212013, China. E-mail:[binzou2009@ujs.edu.cn](mailto:binzou2009@ujs.edu.cn)

## 1. Thermogravimetric analysis (TGA) images.

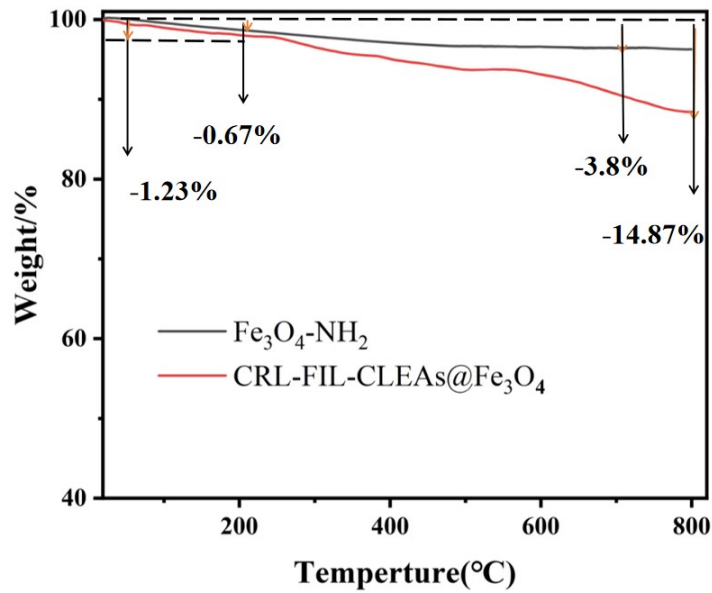

**Fig. 1s** Thermogravimetric analysis (TGA) of Fe<sub>3</sub>O<sub>4</sub>-NH<sub>2</sub> and CRL-FIL-CLEAs@Fe<sub>3</sub>O<sub>4</sub>.

TGA curves of Fe<sub>3</sub>O<sub>4</sub>-NH<sub>2</sub> and CRL-FIL-CLEAs@Fe<sub>3</sub>O<sub>4</sub> under nitrogen were studied (**Fig.1s**). The first weight loss of Fe<sub>3</sub>O<sub>4</sub>-NH<sub>2</sub> and CRL-FIL-CLEAs@Fe<sub>3</sub>O<sub>4</sub> occurred at low temperatures (< 250°C) due to the evaporation of adsorbed and bound water. At 300–800°C, part of the mass lost was attributed to the decomposition of APTES. Fe<sub>3</sub>O<sub>4</sub>-NH<sub>2</sub> magnetic nanoparticles showed excellent thermal stability, and the residual mass was about 96.4%. The second weight loss of CRL-FIL-CLEAs@Fe<sub>3</sub>O<sub>4</sub> occurred after 250°C, which was due to the decomposition of lipase protein molecules. The loading of CRL was about 0.16 mg protein/mg CRL-FIL-CLEAs@Fe<sub>3</sub>O<sub>4</sub>.

## 2. Reuse of different catalysts in the esterification reaction.

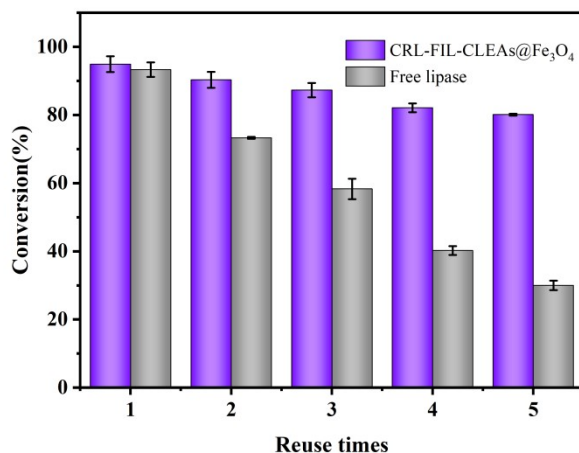

**Fig.2s Reuse of different catalysts in the esterification reaction.**

As shown in **Fig. 2s**, the phytosterol conversion of CRL-FIL-CLEAs@Fe<sub>3</sub>O<sub>4</sub> system remained at 80.02% after five cycles, while that of free lipase system was only 29.91%. The loss of immobilized lipase activity may be due to the separation of CRL-FIL-CLEAs and some Fe<sub>3</sub>O<sub>4</sub> nanoparticles in a long-term repetitive experiment. Compared with the free lipase, CRL-FIL-CLEAs@Fe<sub>3</sub>O<sub>4</sub> has good reusability in the biocatalytic system. Combined with the catalytic activity and thermal stability of the immobilized lipase, CRL-FIL-CLEAs@Fe<sub>3</sub>O<sub>4</sub> was a catalyst with excellent performance.

### 3. Confocal laser scanning microscopy (CLSM) images.

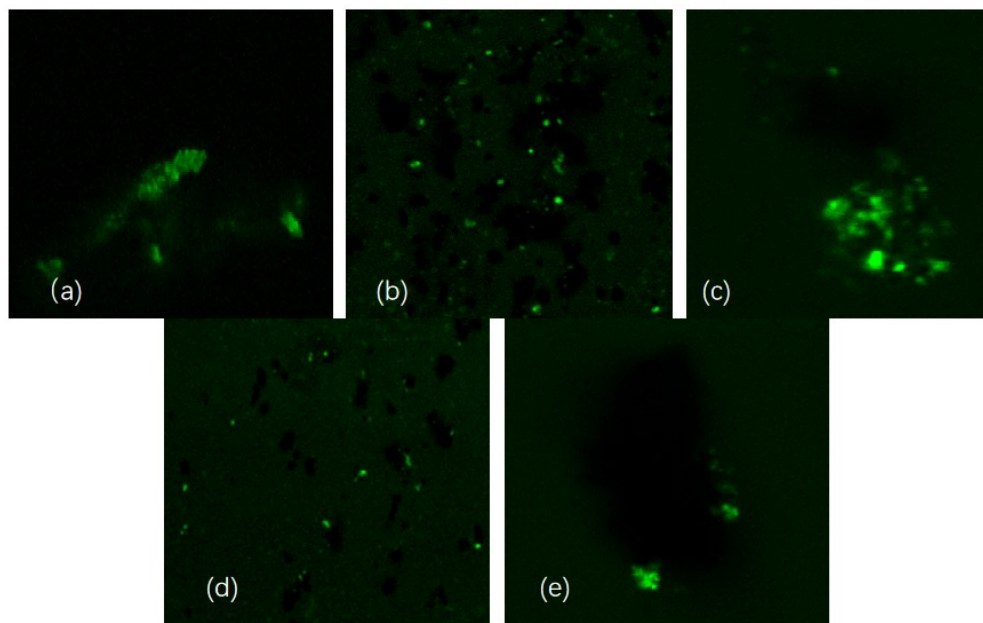

**Fig.3s (a) Free lipase; (b) CRL-FIL-CLEAs@Fe<sub>3</sub>O<sub>4</sub>; (c) CRL-FIL-CLEAs@Fe<sub>3</sub>O<sub>4</sub> (5X); (d) CRL-FIL-CLEAs @Fe<sub>3</sub>O<sub>4</sub> (repeat-ed 5 times); (e) CRL-FIL-CLEAs@Fe<sub>3</sub>O<sub>4</sub> (repeated 5 times, 5X).**

The conformational changes of immobilized lipase before and after the reaction were observed by CLSM. As shown in **Fig. 3s(a)**, the free lipase emits green fluorescence after FITC staining. It can be observed that the aggregation morphology of lipase molecules was connected to magnetic nanoparticles before using (**Fig. 3s(b)(c)**). After repeated use five times (**Fig. 3s(d)(e)**), due to mechanical loss and other factors, it can be observed that some cross-linked enzyme aggregates fall off from magnetic nanoparticles. This explains the decrease in CRL-FIL-CLEAs@Fe<sub>3</sub>O<sub>4</sub> activity after reuse.

**4. Conversion of phytosterols with CRL-FIL-CLEAs@Fe<sub>3</sub>O<sub>4</sub> at different times (Table 1s).**

**Table 1s** Conversion of  $\beta$ -sitosterol with CRL-FIL-CLEAs@Fe<sub>3</sub>O<sub>4</sub>.

| Time (h) | Conversion (%) |
|----------|----------------|
| 2        | 11.03          |
| 4        | 17.29          |
| 6        | 31.92          |
| 8        | 49.20          |
| 10       | 60.48          |
| 12       | 68.58          |
| 14       | 75.35          |
| 16       | 84.23          |
| 18       | 91.23          |
| 20       | 92.01          |
| 22       | 93.24          |

## 5. Comparison of enzyme-catalyzed esterification of phytosterols (Table 2s)

**Table 2s** Comparison of enzyme-catalyzed esterification of phytosterols and fatty acids (FA) with other reported references.

| Substrate                       | Enzyme                                           | Parameters <sup>a</sup>                                    | Conversion | Time | Ref.         |
|---------------------------------|--------------------------------------------------|------------------------------------------------------------|------------|------|--------------|
| Phytosterols<br>/Lauric acid    | CRL                                              | [Bmim]PF 6<br>/Tween20/H <sub>2</sub> O, 50°C,<br>A/P 2: 1 | 87.9%      | 24 h | 54           |
| Phytosterols<br>/Oleic acid     | CRL                                              | n-Hexane, 30°C,<br>A/P 5: 1                                | 80%        | 24 h | 55           |
| Phytosterols<br>/Linoleic acid  | Immobilized CRL                                  | Isooctane, 50°C,<br>A/P 2:1                                | 85.8%      | 24 h | 56           |
| Phytosterols<br>/linolenic acid | NMC/MoS <sub>2</sub> @CRL                        | 60% PBS, 55°C,<br>A/P 2: 1                                 | 75%        | 42 h | 57           |
| Phytosterols<br>/Oleic acid     | CRL-FIL-<br>CLEAs@Fe <sub>3</sub> O <sub>4</sub> | Solvent-free, 48°C, A/P<br>10:1                            | 93.24%     | 22 h | This<br>work |

<sup>a</sup>: A/P: molar ratio of acids to phytosterols.

## 6. Secondary structures for free lipase and CRL-FIL-CLEAs@Fe<sub>3</sub>O<sub>4</sub> (Table 3s)

**Table 3s** Secondary structures for free lipase and CRL-FIL-CLEAs@Fe<sub>3</sub>O<sub>4</sub>.

| Samples                                      | $\beta$ -sheet(%) | Random coil(%) | $\alpha$ -helix(%) | $\beta$ -turn(%) |
|----------------------------------------------|-------------------|----------------|--------------------|------------------|
| Free lipase                                  | 26.57±0.19        | 35.65±0.23     | 25.33±0.11         | 12.45±0.18       |
| CRL-FIL-CLEAs@Fe <sub>3</sub> O <sub>4</sub> | 31.34±0.21        | 33.57±0.13     | 19.42±0.15         | 15.67±0.20       |
